# Supplementary figures and images for: Understanding water structure from Raman spectra of isotopic substitution H2O/D2O up to 573 K
Source: Royal Society of Chemistry journal article supplement (doi:10.1039/c7cp02065a), 2017-01-01

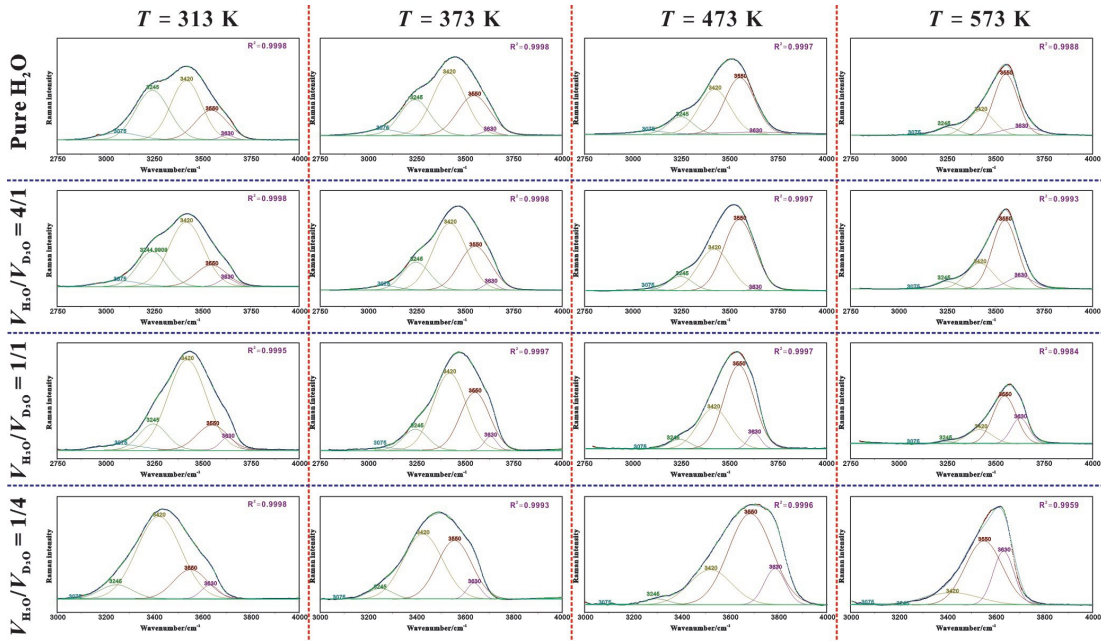

Supplement: c7cp02065a3.pdf [file c7cp02065a3.pdf]

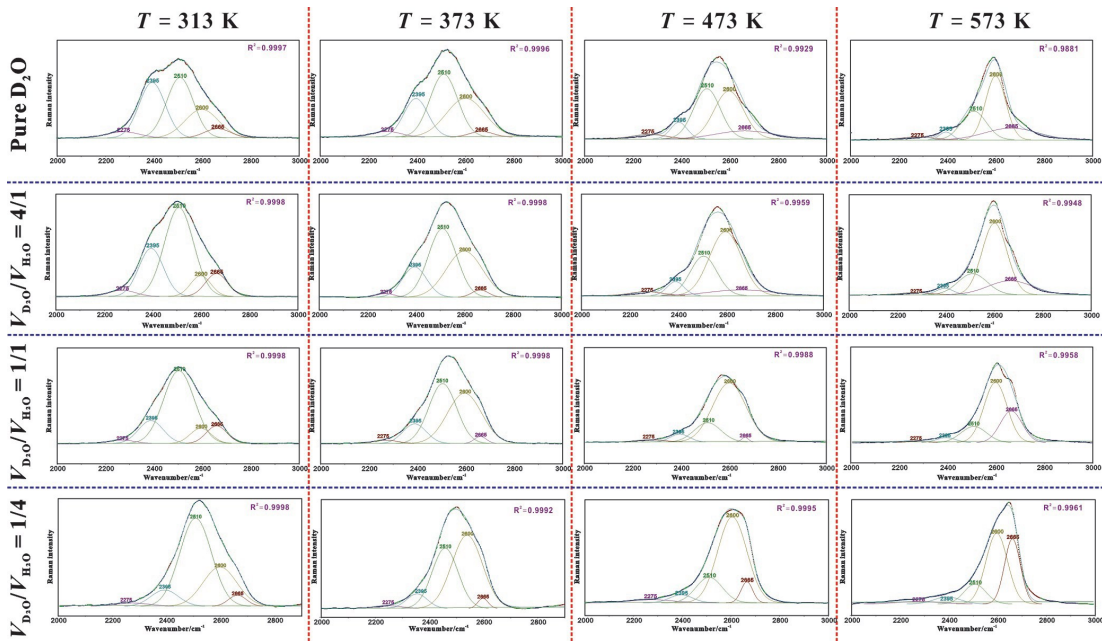

Supplement: c7cp02065a4.pdf [file c7cp02065a4.pdf]
